# Supplementary material for: A Novel Tri-Hydroxy-Methylated Chalcone Isolated from Chromolaena tacotana with Anti-Cancer Potential Targeting Pro-Survival Proteins
Source: MDPI journal article supplement (doi:10.3390/ijms242015185), 2023-10-14
Supplement: s1 [file s1]

# SUPPLEMENTARY INFORMATION

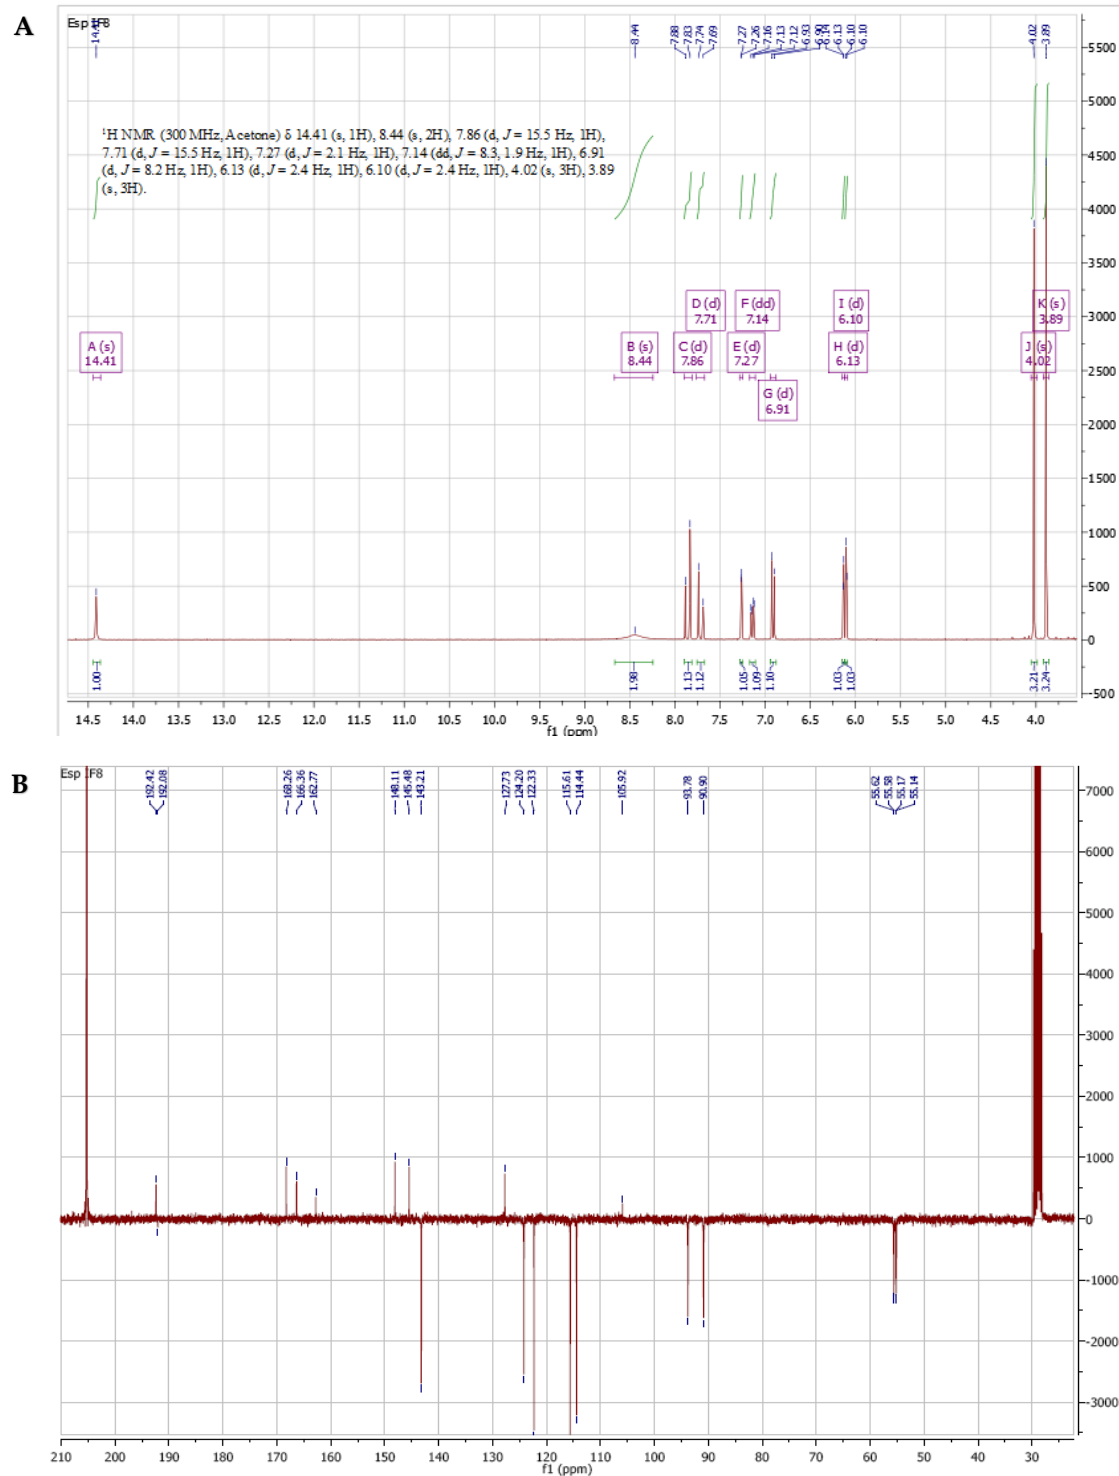

**Figure S1:** Nuclear Magnetic Resonance Spectroscopy of Chalcotanina (2',3,4-trihydroxy- 4',6'-dimetoxichalcone). A. <sup>1</sup>H NMR spectrum. B. <sup>13</sup>C NMR spectrum (75 MHz, CDCl<sub>3</sub>)

# <Spectrum>

Line#:1 R.Time:----(Scan#----)  
MassPeaks:20411  
RawMode:Averaged 0.533-0.913(321-549) BasePeak:655.1749(496287)  
BG Mode:None Segment 1 - Event 1

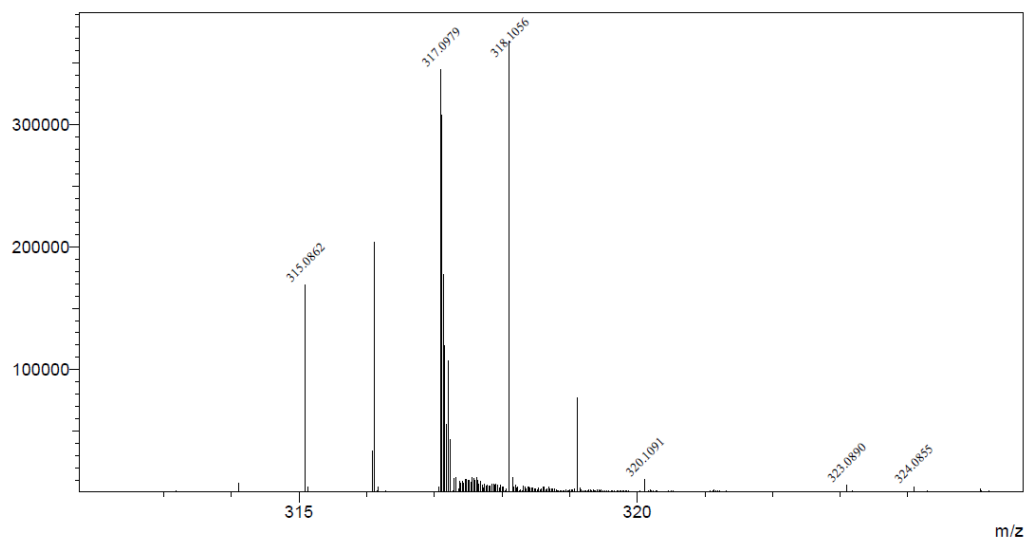

**Figure S2.** HPLC/QTOF analysis ESI positive ion mode of Chalcotanina  $[M+H]^+$ : 317,00979

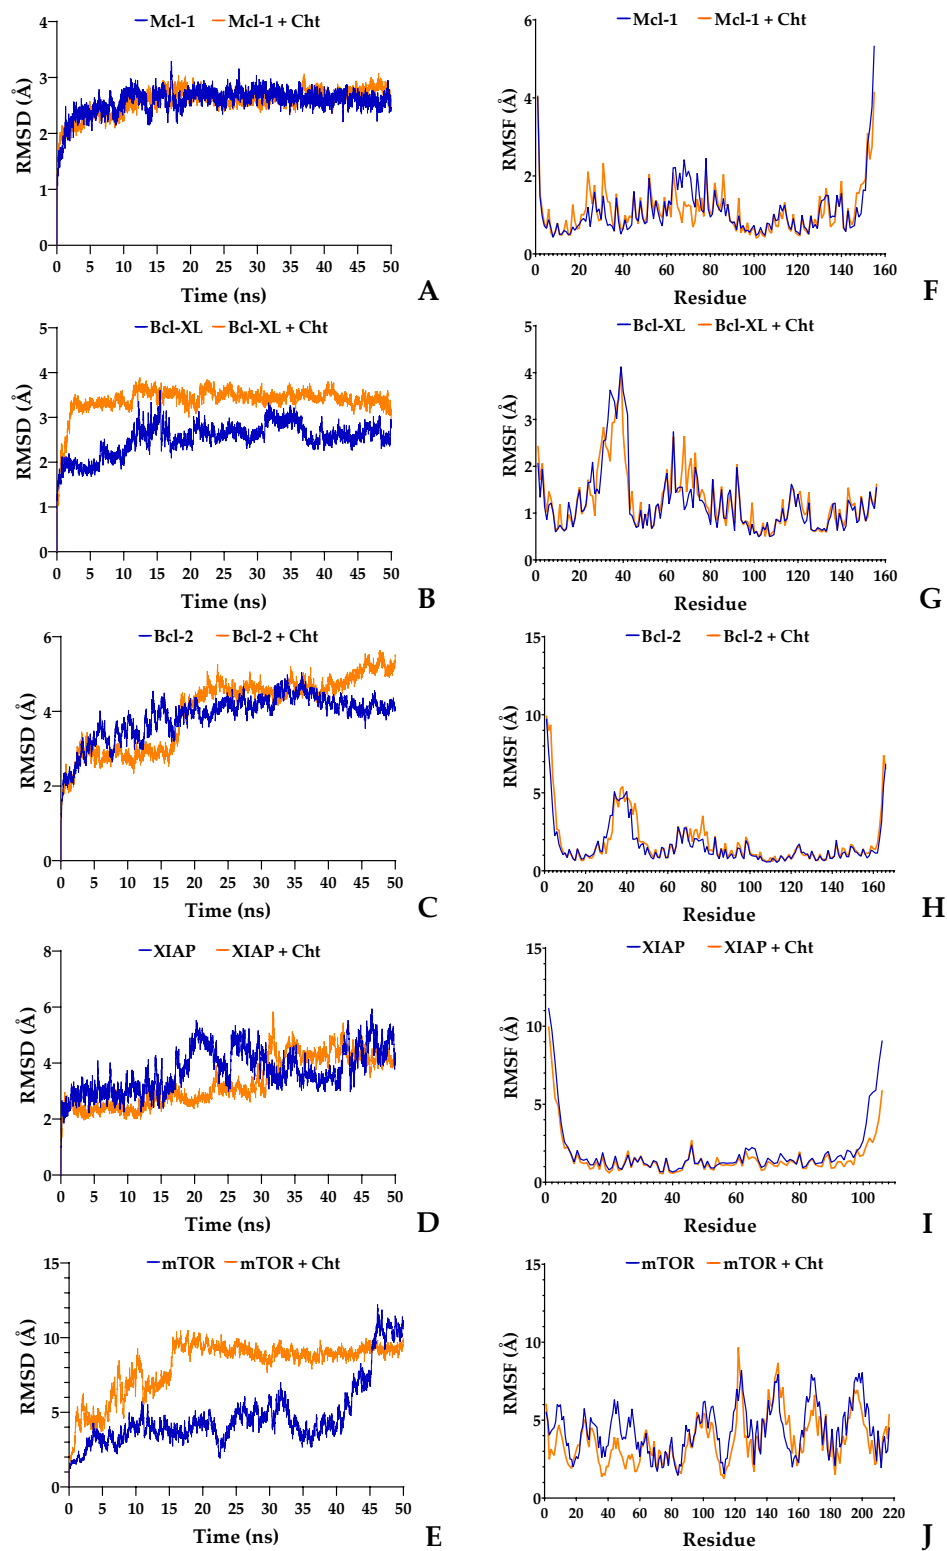

**Figure S3.** The root-mean-square deviation and fluctuation of pro-survival proteins in response to Chalcotanina. (A-D) RMSD trajectories for each protein: (A) Bcl-2, (B) Bcl-XL, (C) Mcl-1, (D) mTOR,

(E) XIAP. Blue traces represent the standalone protein, while the orange traces depict the protein-ligand complex with Chalcotanina. (F-J) RMSF profiles for each protein: (F) Mcl-1, (G) Bcl-XL, (H) Bcl-2, (I) XIAP and (J) mTOR. The blue shades indicate the protein in its unliganded state, while the orange traces represent the bound state with Chalcotanina.
